# Supplementary material for: Interdigitated cathode–electrolyte architectural design for fast-charging lithium metal battery with lithium oxyhalide solid-state electrolyte
Source: Royal Society of Chemistry journal article supplement (doi:10.1039/d2ma00512c), 2022-01-01
Supplement: d2ma00512c1.pdf [file d2ma00512c1.pdf]

## Interdigitated Cathode-Electrolyte Architectural Design for Fast-Charging Lithium Metal Battery with Lithium Oxyhalide Solid-State Electrolyte

Abu Md Numan-Al-Mobin<sup>1</sup>, Ben Schmidt<sup>2</sup>, Armand Lannerd<sup>1</sup>, Mark Viste<sup>3</sup>, Q. Qiao<sup>4</sup>, Alevtina Smirnova<sup>1</sup>

<sup>1</sup>South Dakota School of Mines and Technology, USA

<sup>2</sup>Physical Electronics Inc., USA

<sup>3</sup>Medtronic Inc., USA

<sup>4</sup>Syracuse University, USA

### Supplementary Figures:

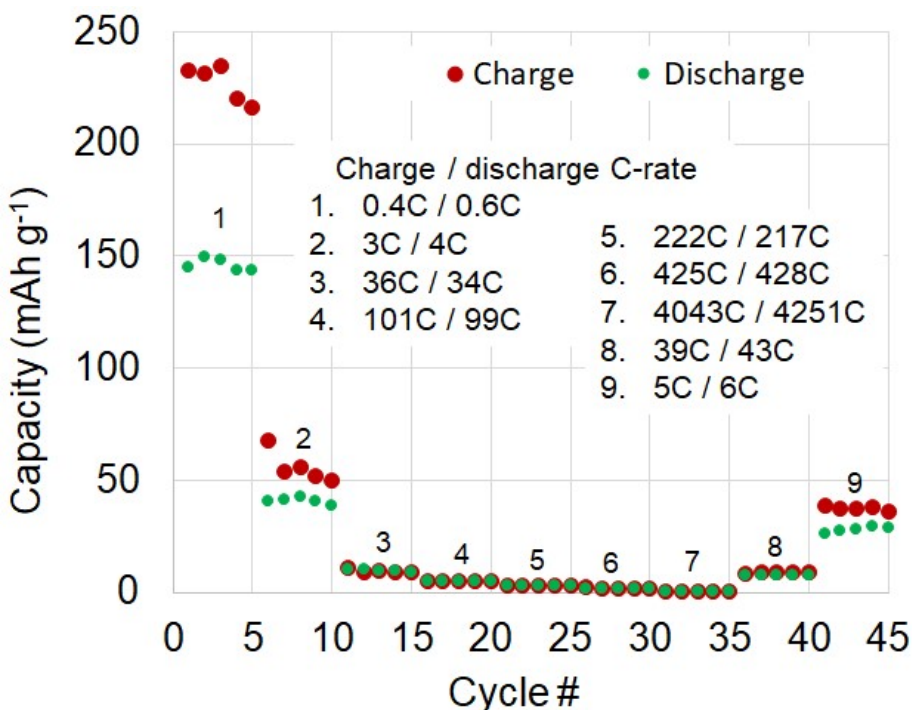

Fig. S1. (c) Capacity of a solid-state cell Al-C|LFP (90%), C(10%)+Li<sub>3</sub>OCl|Li<sub>3</sub>OCl|Li at different C-rates in charge/discharge cycles according to the schedule depicted in Fig. 6a. Initial higher specific capacity corresponds to the lower charge (0.4C) and discharge (0.6C) C-rates, respectively. Similarly, at a high C-rate (around 4000C), the specific capacity becomes extremely low (0.02 mAhg<sup>-1</sup>), which is expected due to the incomplete electrochemical reactions within the cell. More importantly, the components for the reaction do not get enough time to switch their positions.

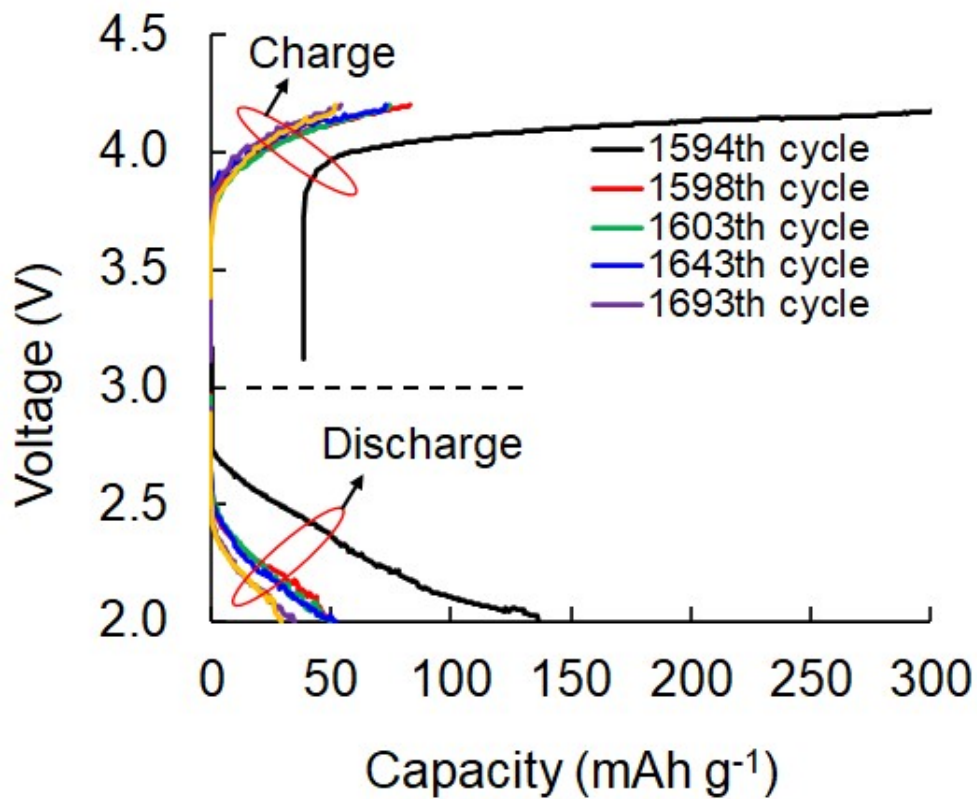

Fig. S2: Experimental voltage profiles of Al-C|LFP(90%),C(10%)+Li<sub>3</sub>OCl|Li<sub>3</sub>OCl|Li solid-state cell in different charge and discharge cycles.

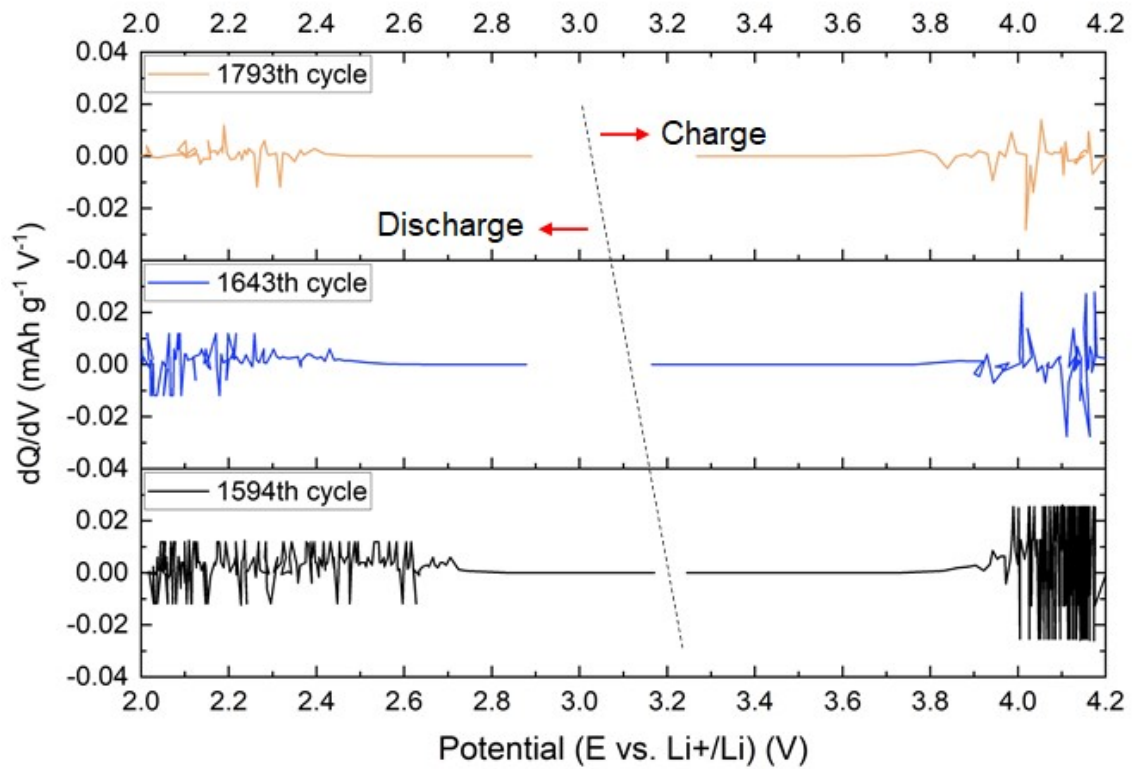

Fig. S3: Differential capacity for the Al-C|LFP(90%),C(10%)+Li<sub>3</sub>OCl|Li<sub>3</sub>OCl|Li solid-state cell in different cycles during the charge and discharge process.
